# Supplementary material
Source: MDPI journal article supplement (https://www.mdpi.com/2077-0472/14/2/206)
Supplement: s1 [file s1]

**Supplementary 1.** The mean values and Duncan groups of germination parameters of tetraploid wheat genotypes of under different drought stress levels.

| Germination Speed (GS) |                             |          |           |           |           |          |
|------------------------|-----------------------------|----------|-----------|-----------|-----------|----------|
| Genotypes              | Drought stress levels (bar) |          |           |           |           | Mean     |
|                        | 0                           | -0.50    | -1.48     | -2.95     | -4.91     |          |
| Altın-40/98            | 97.8 ab <sup>1</sup>        | 97.8 ab  | 95.5 a-c  | 93.3 a-d  | 84.4 e-h  | 93.8 A   |
| Artuklu                | 97.8 ab                     | 95.5 a-c | 91.1 b-e  | 82.2 f-i  | 86.6 d-g  | 90.6 B   |
| Çakmak-79              | 97.8 ab                     | 93.3 a-d | 95.5 a-c  | 84.4 e-h  | 77.8 h-k  | 89.8 BC  |
| Çeşit-1252             | 100.0 a                     | 95.5 a-c | 86.6 d-g  | 82.2 f-i  | 77.7 i-k  | 87.9 BC  |
| Eminbey                | 100.0 a                     | 97.8 ab  | 82.2 f-i  | 82.2 f-i  | 75.5 h-l  | 87.5 BC  |
| Kızıltan-91            | 97.8 ab                     | 100.0 a  | 84.4 e-h  | 84.4 e-h  | 77.8 h-k  | 88.9 BC  |
| Kunduru-1149           | 100.0 a                     | 93.3 a-d | 84.4 e-h  | 82.2 f-i  | 73.3 j-l  | 86.7 CD  |
| Meram-2002             | 97.8 ab                     | 95.5 a-c | 84.4 e-h  | 73.3 j-l  | 70.0 kl   | 84.2 D   |
| Mirzabey 2000          | 100.0 a                     | 97.8 ab  | 95.5 a-c  | 81.1 f-j  | 73.3 j-l  | 89.5 BC  |
| Sarıçanak 98           | 95.5 a-c                    | 95.5 a-c | 88.8 c-f  | 82.2 f-i  | 76.7 h-k  | 87.8 BC  |
| Selçuklu-97            | 100.0 a                     | 95.5 a-c | 82.2 f-i  | 82.2 f-i  | 73.3 j-l  | 86.7 CD  |
| <i>T. dicoccum</i>     | 88.8 c-f                    | 91.1 b-e | 80.0 g-j  | 70.0 kl   | 67.7 l    | 79.6 E   |
| Mean                   | 97.6 A                      | 95.7 A   | 87.6 B    | 81.6 C    | 76.2 D    | 87.8     |
| Germination Power (GP) |                             |          |           |           |           |          |
| Altın-40/98            | 100.0                       | 100.0    | 97.8      | 100.0     | 95.5      | 98.7 A   |
| Artuklu                | 100.0                       | 97.8     | 95.3      | 95.3      | 93.3      | 96.4 AB  |
| Çakmak-79              | 97.8                        | 100.0    | 97.8      | 93.3      | 91.1      | 95.9 AB  |
| Çeşit-1252             | 100.0                       | 97.8     | 97.8      | 95.5      | 91.1      | 96.4 AB  |
| Eminbey                | 100.0                       | 100.0    | 95.5      | 86.6      | 84.4      | 93.3 B   |
| Kızıltan-91            | 100.0                       | 100.0    | 97.8      | 91.1      | 93.3      | 96.4 AB  |
| Kunduru-1149           | 100.0                       | 97.8     | 95.5      | 93.3      | 84.4      | 94.2 B   |
| Meram-2002             | 97.8                        | 100.0    | 95.5      | 93.3      | 86.6      | 94.7 B   |
| Mirzabey 2000          | 100.0                       | 100.0    | 97.8      | 88.8      | 86.6      | 94.7 B   |
| Sarıçanak 98           | 97.8                        | 100.0    | 95.5      | 93.3      | 91.1      | 95.5 AB  |
| Selçuklu-97            | 100.0                       | 97.8     | 93.3      | 88.8      | 91.1      | 94.2 B   |
| <i>T. dicoccum</i>     | 91.1                        | 95.5     | 86.6      | 86.6      | 81.1      | 88.2 C   |
| Mean                   | 98.7 A                      | 98.9 A   | 95.5 B    | 92.2 C    | 89.1 D    | 94.9     |
| Root Length (RL)       |                             |          |           |           |           |          |
| Altın-40/98            | 12.090 d                    | 6.420 h  | 5.573 i-k | 2.227 u-x | 1.117 z   | 5.485 CD |
| Artuklu                | 12.363 d                    | 7.097 gh | 5.693 ij  | 3.320 o-s | 2.217 u-x | 6.138 BC |
| Çakmak-79              | 12.357 d                    | 6.043 hi | 4.813 kl  | 2.233 u-x | 1.073 z   | 5.304 CD |
| Çeşit-1252             | 14.933 b                    | 5.837 i  | 3.670 o-q | 1.763 w-z | 2.560 s-v | 5.753 C  |
| Eminbey                | 14.747 b                    | 7.723 g  | 5.653 ij  | 3.300 o-s | 2.623 s-v | 6.809 B  |

|                          |           |           |           |           |           |          |
|--------------------------|-----------|-----------|-----------|-----------|-----------|----------|
| Kızıltan-91              | 15.733 a  | 9.567 f   | 7.833 g   | 3.077 p-t | 3.277 o-s | 7.897 A  |
| Kunduru-1149             | 12.343 d  | 5.613 ij  | 3.930 m-o | 2.767 r-u | 2.487 t-w | 5.428 CD |
| Meram-2002               | 11.377 e  | 6.260 hi  | 3.477 o-r | 1.417 yz  | 1.107 z   | 4.727 F  |
| Mirzabey 2000            | 11.263 e  | 6.833 h   | 5.257 j-l | 3.010 p-u | 1.687 x-z | 5.610 C  |
| Sarıçanak 98             | 13.927 c  | 8.890 fg  | 6.830 h   | 3.067 p-t | 3.093 p-t | 7.341 AB |
| Selçuklu-97              | 9.897 f   | 4.603 lm  | 4.507 l-n | 1.687 x-z | 1.310 yz  | 4.401 F  |
| <i>T. dicoccum</i>       | 9.340 f   | 6.153 hu  | 3.813 n-p | 3.747 o-q | 2.240 u-x | 5.059 E  |
| Mean                     | 12.531 A  | 6.752 B   | 5.087 C   | 2.709 D   | 2.066 E   | 5.829    |
| <b>Shoot Length (SL)</b> |           |           |           |           |           |          |
| Altın-40/98              | 9.627 c   | 4.713 hi  | 3.333 k-m | 0.957 t-w | 0.433 u-y | 3.453 D  |
| Artuklu                  | 8.117 e   | 3.327 k-m | 0.917 t-w | 0.530 u-y | 0.407 u-y | 2.659 F  |
| Çakmak-79                | 8.847 d   | 2.690 m-o | 0.403 u-y | 0.110 y   | 0 y       | 2.410 G  |
| Çeşit-1252               | 7.380 f   | 1.683 q-s | 0.853 t-x | 0 y       | 0 y       | 1.983 H  |
| Eminbey                  | 18.610 a  | 4.367 h-j | 2.107 o-q | 0.123 y   | 0 y       | 5.041 A  |
| Kızıltan-91              | 11.060 b  | 4.217 ij  | 3.903 jk  | 0.560 u-y | 0 y       | 3.948 B  |
| Kunduru-1149             | 9.037 cd  | 2.860 mn  | 1.627 q-s | 0.693 t-y | 0.017 y   | 2.847 E  |
| Meram-2002               | 9.147 cd  | 4.967 h   | 0.217 w-y | 0 y       | 0 y       | 2.866 E  |
| Mirzabey 2000            | 9.467 cd  | 4.760 hi  | 2.423 n-p | 0.927 t-w | 0.413 u-y | 3.598 CD |
| Sarıçanak 98             | 7.677 ef  | 4.900 h   | 3.227 lm  | 0.983 t-w | 0.547 u-y | 3.647 C  |
| Selçuklu-97              | 6.730 g   | 3.729 j-l | 1.363 r-t | 0 y       | 0 y       | 2.365 G  |
| <i>T. dicoccum</i>       | 7.953 ef  | 2.543 n-p | 1.923 p-r | 1.123 s-u | 0.480 u-y | 2.805 EF |
| Mean                     | 9.471 A   | 3.730 B   | 1.858 C   | 0.426 D   | 0.191 D   | 3.135    |
| <b>Fresh Weight (FW)</b> |           |           |           |           |           |          |
| Altın-40/98              | 1.910 b   | 1.618 fg  | 1.552 gh  | 1.029 n-s | 0.895 t-x | 1.401 B  |
| Artuklu                  | 1.721 de  | 1.486 h   | 1.037 n-q | 0.833 v-z | 0.762 yz  | 1.168 F  |
| Çakmak-79                | 1.793 cd  | 1.390 i   | 0.926 s-v | 0.859 u-y | 0.646 z   | 1.123 G  |
| Çeşit-1252               | 1.930 b   | 1.280 j-l | 1.046 n-q | 0.933 r-v | 0.868 u-y | 1.211 E  |
| Eminbey                  | 2.223 a   | 1.672 ef  | 1.311 i-k | 1.022 n-s | 0.846 u-z | 1.415 AB |
| Kızıltan-91              | 1.906 b   | 1.582 f-h | 1.183 l-m | 0.942 q-v | 0.839 v-z | 1.291 CD |
| Kunduru-1149             | 1.903 b   | 1.383 ij  | 1.106 mn  | 0.957 q-u | 0.804 t-w | 1.231 D  |
| Meram-2002               | 1.904 b   | 1.533 gh  | 0.793 x-z | 0.748 z   | 0.638 z   | 1.123 G  |
| Mirzabey 2000            | 1.839 bc  | 1.596 fg  | 1.254 kl  | 1.100 m-o | 0.995 o-t | 1.357 C  |
| Sarıçanak 98             | 1.824 bc  | 1.570 f-h | 1.175 lm  | 1.082 m-o | 0.814 z   | 1.293 CD |
| Selçuklu-97              | 1.269 kl  | 1.122 mn  | 0.913 t-v | 0.851 u-z | 0.694 z   | 0.970 H  |
| <i>T. dicoccum</i>       | 1.331 i-k | 1.082 m-p | 0.996 o-t | 0.849 u-z | 0.715 z   | 0.995 H  |
| Mean                     | 1.796 A   | 1.443 B   | 1.107 C   | 0.933 D   | 0.793 E   | 1.215    |
| <b>Dry Weight (DW)</b>   |           |           |           |           |           |          |
| Altın-40/98              | 0.413 n-q | 0.410 o-r | 0.478 f-j | 0.468 h-k | 0.473 g-k | 0.448 D  |

|                                        |           |           |           |           |           |         |
|----------------------------------------|-----------|-----------|-----------|-----------|-----------|---------|
| Artuklu                                | 0.372 t-w | 0.325 xy  | 0.408 o-s | 0.405 p-t | 0.479 f-j | 0.398 E |
| Çakmak-79                              | 0.310 yz  | 0.432 l-p | 0.418 m-q | 0.453 j-m | 0.447 j-n | 0.412 E |
| Çeşit-1252                             | 0.439 k-p | 0.527 b-d | 0.528 b-d | 0.596 a   | 0.555 b   | 0.529 B |
| Eminbey                                | 0.524 c-e | 0.599 a   | 0.559 b   | 0.598 a   | 0.624 a   | 0.581 A |
| Kızıltan-91                            | 0.422 m-p | 0.491 e-i | 0.484 f-i | 0.447 j-n | 0.515 c-e | 0.472 C |
| Kunduru-1149                           | 0.354 v-x | 0.493 d-h | 0.525 c-e | 0.517 c-e | 0.505 c-g | 0.479 C |
| Meram-2002                             | 0.376 r-w | 0.374 s-w | 0.430 l-p | 0.409 o-s | 0.446 j-n | 0.407 D |
| Mirzabey 2000                          | 0.383 q-v | 0.406 p-t | 0.425 l-p | 0.491 e-i | 0.503 c-g | 0.442 D |
| Sarıçanak 98                           | 0.426 l-p | 0.406 p-t | 0.447 j-n | 0.484 f-i | 0.494 d-h | 0.451 D |
| Selçuklu-97                            | 0.384 q-v | 0.414 n-q | 0.458 i-l | 0.481 f-j | 0.494 d-h | 0.446 D |
| <i>T. dicoccum</i>                     | 0.292 z   | 0.348 wx  | 0.370 u-w | 0.403 p-u | 0.420 m-p | 0.367 F |
| Mean                                   | 0.391 D   | 0.435 C   | 0.461 B   | 0.479 BA  | 0.496 A   | 0.453   |
| <b>Water Absorption Capacity (WAC)</b> |           |           |           |           |           |         |
| Altın-40/98                            | 78.4 a-d  | 74.7 c-e  | 69.2 e-g  | 54.5 m-p  | 47.2 q-t  | 64.8 A  |
| Artuklu                                | 78.4 a-d  | 78.1 a-d  | 60.7 i-l  | 51.4 o-r  | 37.1 w    | 61.1 BC |
| Çakmak-79                              | 82.7 a    | 68.9 fg   | 54.9 l-p  | 47.3 q-t  | 30.8 xy   | 56.9 D  |
| Çeşit-1252                             | 77.3 a-d  | 58.8 j-m  | 49.5 p-s  | 36.1 wx   | 36.1 wx   | 51.6 EF |
| Eminbey                                | 76.4 b-d  | 64.2 g-j  | 57.4 k-n  | 41.5 u-w  | 26.2y     | 53.1 E  |
| Kızıltan-91                            | 77.9 a-d  | 69.0 e-g  | 59.1 j-m  | 52.5 n-q  | 38.6 vw   | 59.4 C  |
| Kunduru-1149                           | 81.4 ab   | 64.4 g-j  | 52.5 n-q  | 46.0 r-u  | 37.2 w    | 56.3 D  |
| Meram-2002                             | 80.3 a-c  | 75.6 cd   | 45.8 r-u  | 45.3 s-u  | 30.1 y    | 55.4 D  |
| Mirzabey-2000                          | 79.2 a-d  | 74.6 c-f  | 66.1 g-i  | 55.4 l-o  | 49.4 ps   | 64.9 A  |
| Sarıçanak 98                           | 76.6 b-d  | 74.1 d-f  | 62.0 i-k  | 55.3 l-o  | 39.3 vw   | 61.5 B  |
| Selçuklu-97                            | 69.7 e-g  | 63.1 h-j  | 49.8 o-s  | 43.5 t-v  | 28.8 y    | 51.0 F  |
| <i>T. dicoccum</i>                     | 78.1 a-d  | 67.8 gh   | 62.9 h-k  | 52.5 n-q  | 41.3 u-w  | 60.5 BC |
| Mean                                   | 78.0 A    | 69.4 B    | 57.5 C    | 48.4 D    | 36.8 E    | 58.0    |

<sup>1</sup>:Means followed by the different letters are significantly different at the 0.05 probability

**Supplementary 2:** Stress tolerance index (STI), stress sensitive index (SSI) values of tetraploid wheat genotypes.

|                        | Genotypes          | Stress tolerance index |       |       |       | Stress sensitive index |       |       |       |
|------------------------|--------------------|------------------------|-------|-------|-------|------------------------|-------|-------|-------|
|                        |                    | -0.50                  | -1.48 | -2.95 | -4.91 | -0.50                  | -1.48 | -2.95 | -4.91 |
| Germination Speed (GS) | Altın-40/98        | 1.00                   | 0.98  | 0.96  | 0.87  | 0.00                   | 0.23  | 0.28  | 0.62  |
|                        | Artuklu            | 0.98                   | 0.94  | 0.84  | 0.89  | 1.21                   | 0.67  | 0.97  | 0.52  |
|                        | Çakmak-79          | 0.96                   | 0.98  | 0.87  | 0.80  | 2.36                   | 0.23  | 0.84  | 0.93  |
|                        | Çeşit-1252         | 1.00                   | 0.91  | 0.86  | 0.82  | 2.31                   | 1.31  | 1.09  | 1.02  |
|                        | Eminbey            | 1.03                   | 0.86  | 0.86  | 0.79  | 1.13                   | 1.74  | 1.09  | 1.12  |
|                        | Kızıltan-91        | 1.03                   | 0.87  | 0.87  | 0.80  | -1.16                  | 1.34  | 0.84  | 0.93  |
|                        | Kunduru-1149       | 0.98                   | 0.89  | 0.86  | 0.77  | 3.44                   | 1.52  | 1.09  | 1.22  |
|                        | Meram-2002         | 0.98                   | 0.87  | 0.75  | 0.72  | 1.21                   | 1.34  | 1.53  | 1.30  |
|                        | Mirzabey 2000      | 1.03                   | 1.00  | 0.85  | 0.77  | 1.13                   | 0.44  | 1.15  | 1.22  |
|                        | Sarıçanak 98       | 0.96                   | 0.89  | 0.82  | 0.77  | 0.00                   | 0.68  | 0.85  | 0.90  |
|                        | Selçuklu-97        | 1.00                   | 0.86  | 0.86  | 0.77  | 2.31                   | 1.74  | 1.09  | 1.22  |
|                        | <i>T. dicoccum</i> | 0.85                   | 0.75  | 0.65  | 0.63  | -1.33                  | 0.97  | 1.29  | 1.08  |
| Germination Power (GP) | Altın-40/98        | 1.03                   | 1.00  | 1.03  | 0.98  | 0.00                   | 0.68  | 0.00  | 0.46  |
|                        | Artuklu            | 1.00                   | 0.98  | 0.98  | 0.96  | 10.86                  | 1.45  | 0.71  | 0.69  |
|                        | Çakmak-79          | 1.00                   | 0.98  | 0.94  | 0.91  | -11.10                 | 0.00  | 0.70  | 0.70  |
|                        | Çeşit-1252         | 1.00                   | 1.00  | 0.98  | 0.94  | 10.86                  | 0.68  | 0.68  | 0.92  |
|                        | Eminbey            | 1.03                   | 0.98  | 0.89  | 0.87  | 0.00                   | 1.39  | 2.03  | 1.60  |
|                        | Kızıltan-91        | 1.03                   | 1.00  | 0.94  | 0.96  | 0.00                   | 0.68  | 1.35  | 0.69  |
|                        | Kunduru-1149       | 1.00                   | 0.98  | 0.96  | 0.87  | 10.86                  | 1.39  | 1.02  | 1.60  |
|                        | Meram-2002         | 1.00                   | 0.96  | 0.94  | 0.87  | -11.10                 | 0.73  | 0.70  | 1.18  |
|                        | Mirzabey 2000      | 1.03                   | 1.00  | 0.91  | 0.89  | 0.00                   | 0.68  | 1.70  | 1.38  |
|                        | Sarıçanak-98       | 1.00                   | 0.96  | 0.94  | 0.91  | -11.10                 | 0.73  | 0.70  | 0.70  |
|                        | Selçuklu-97        | 1.00                   | 0.96  | 0.91  | 0.94  | 10.86                  | 2.07  | 1.70  | 0.92  |
|                        | <i>T. dicoccum</i> | 0.89                   | 0.81  | 0.81  | 0.76  | -23.84                 | 1.52  | 0.75  | 1.13  |
| Root Length (RL)       | Altın-40/98        | 0.89                   | 0.77  | 0.31  | 0.15  | 1.02                   | 0.91  | 1.04  | 1.09  |
|                        | Artuklu            | 1.01                   | 0.81  | 0.47  | 0.31  | 0.92                   | 0.91  | 0.93  | 0.98  |
|                        | Çakmak-79          | 0.86                   | 0.68  | 0.32  | 0.15  | 1.11                   | 1.03  | 1.05  | 1.09  |
|                        | Çeşit-1252         | 1.00                   | 0.63  | 0.30  | 0.44  | 1.32                   | 1.27  | 1.13  | 0.99  |
|                        | Eminbey            | 1.31                   | 0.96  | 0.56  | 0.44  | 1.03                   | 1.04  | 0.99  | 0.98  |
|                        | Kızıltan-91        | 1.73                   | 1.41  | 0.55  | 0.59  | 0.85                   | 0.85  | 1.03  | 0.95  |
|                        | Kunduru-1149       | 0.79                   | 0.56  | 0.39  | 0.35  | 1.18                   | 1.15  | 0.99  | 0.96  |
|                        | Meram-2002         | 0.82                   | 0.45  | 0.18  | 0.14  | 0.98                   | 1.17  | 1.12  | 1.08  |
|                        | Mirzabey 2000      | 0.88                   | 0.68  | 0.39  | 0.22  | 0.85                   | 0.90  | 0.93  | 1.02  |
|                        | Sarıçanak-98       | 1.42                   | 1.09  | 0.49  | 0.49  | 0.78                   | 0.86  | 0.99  | 0.93  |
|                        | Selçuklu-97        | 0.52                   | 0.51  | 0.19  | 0.15  | 1.16                   | 0.92  | 1.06  | 1.04  |
|                        | <i>T. dicoccum</i> | 0.66                   | 0.41  | 0.40  | 0.24  | 0.74                   | 1.00  | 0.76  | 0.91  |
| Shoot Length           | Altın-40/98        | 0.51                   | 0.36  | 0.10  | 0.05  | 0.84                   | 0.81  | 0.94  | 0.97  |
|                        | Artuklu            | 0.30                   | 0.08  | 0.05  | 0.04  | 0.97                   | 1.10  | 0.98  | 0.97  |
|                        | Çakmak-79          | 0.27                   | 0.04  | 0.01  | 0.00  | 1.15                   | 1.19  | 1.03  | 1.02  |
|                        | Çeşit-1252         | 0.14                   | 0.07  | 0.00  | 0.00  | 1.27                   | 1.10  | 1.05  | 1.02  |

|                                 |                    |      |      |      |      |       |      |      |      |
|---------------------------------|--------------------|------|------|------|------|-------|------|------|------|
|                                 | Eminbey            | 0.91 | 0.44 | 0.02 | 0.00 | 1.06  | 1.10 | 1.04 | 1.02 |
|                                 | Kızıltan-91        | 0.52 | 0.48 | 0.07 | 0.00 | 1.02  | 0.81 | 0.99 | 1.02 |
|                                 | Kunduru-1149       | 0.29 | 0.16 | 0.07 | 0.00 | 1.13  | 1.02 | 0.97 | 1.02 |
|                                 | Meram-2002         | 0.51 | 0.02 | 0.00 | 0.00 | 0.75  | 1.21 | 1.05 | 1.02 |
|                                 | Mirzabey 2000      | 0.50 | 0.26 | 0.09 | 0.04 | 0.82  | 0.93 | 0.94 | 0.98 |
|                                 | Sarıçanak-98       | 0.42 | 0.28 | 0.08 | 0.05 | 0.60  | 0.72 | 0.91 | 0.95 |
|                                 | Selçuklu-97        | 0.28 | 0.10 | 0.00 | 0.00 | 0.74  | 0.99 | 1.05 | 1.02 |
|                                 | <i>T. dicoccum</i> | 0.23 | 0.17 | 0.09 | 0.04 | 1.12  | 0.94 | 0.90 | 0.96 |
|                                 |                    |      |      |      |      |       |      |      |      |
| Fresh Weight (FW)               | Altın-40/98        | 0.96 | 0.92 | 0.61 | 0.53 | 0.78  | 0.49 | 0.96 | 0.95 |
|                                 | Artuklu            | 0.79 | 0.55 | 0.44 | 0.41 | 0.69  | 1.04 | 1.07 | 1.00 |
|                                 | Çakmak-79          | 0.77 | 0.51 | 0.48 | 0.36 | 1.14  | 1.26 | 1.08 | 1.15 |
|                                 | Çeşit-1252         | 0.77 | 0.63 | 0.56 | 0.52 | 1.71  | 1.19 | 1.08 | 0.99 |
|                                 | Eminbey            | 1.15 | 0.90 | 0.70 | 0.58 | 1.26  | 1.07 | 1.12 | 1.11 |
|                                 | Kızıltan-91        | 0.93 | 0.70 | 0.56 | 0.50 | 0.86  | 0.99 | 1.05 | 1.00 |
|                                 | Kunduru-1149       | 0.82 | 0.65 | 0.56 | 0.47 | 1.39  | 1.09 | 1.03 | 1.03 |
|                                 | Meram-2002         | 0.90 | 0.47 | 0.44 | 0.38 | 0.99  | 1.52 | 1.26 | 1.19 |
|                                 | Mirzabey 2000      | 0.91 | 0.71 | 0.63 | 0.57 | 0.67  | 0.83 | 0.84 | 0.82 |
|                                 | Sarıçanak-98       | 0.89 | 0.66 | 0.61 | 0.46 | 0.71  | 0.93 | 0.85 | 0.99 |
|                                 | Selçuklu-97        | 0.44 | 0.36 | 0.33 | 0.27 | 0.59  | 0.73 | 0.69 | 0.81 |
|                                 | <i>T. dicoccum</i> | 0.45 | 0.41 | 0.35 | 0.30 | 0.95  | 0.66 | 0.75 | 0.83 |
|                                 |                    |      |      |      |      |       |      |      |      |
| Dry Weight (DW)                 | Altın-40/98        | 1.11 | 1.29 | 1.26 | 1.28 | -0.06 | 0.88 | 0.59 | 0.54 |
|                                 | Artuklu            | 0.79 | 0.99 | 0.99 | 1.17 | -1.12 | 0.54 | 0.39 | 1.07 |
|                                 | Çakmak-79          | 0.88 | 0.85 | 0.92 | 0.91 | 3.50  | 1.95 | 2.05 | 1.65 |
|                                 | Çeşit-1252         | 1.51 | 1.52 | 1.71 | 1.59 | 1.78  | 1.13 | 1.59 | 0.98 |
|                                 | Eminbey            | 2.05 | 1.92 | 2.05 | 2.14 | 1.27  | 0.37 | 0.63 | 0.71 |
|                                 | Kızıltan-91        | 1.36 | 1.34 | 1.23 | 1.42 | 1.45  | 0.82 | 0.26 | 0.82 |
|                                 | Kunduru-1149       | 1.14 | 1.22 | 1.20 | 1.17 | 3.49  | 2.70 | 2.05 | 1.59 |
|                                 | Meram-2002         | 0.92 | 1.06 | 1.01 | 1.10 | -0.05 | 0.80 | 0.39 | 0.69 |
|                                 | Mirzabey 2000      | 1.02 | 1.06 | 1.23 | 1.26 | 0.53  | 0.61 | 1.25 | 1.17 |
|                                 | Sarıçanak-98       | 1.13 | 1.25 | 1.35 | 1.38 | -0.42 | 0.28 | 0.60 | 0.59 |
|                                 | Selçuklu-97        | 1.04 | 1.15 | 1.21 | 1.24 | 0.69  | 1.08 | 1.12 | 1.07 |
|                                 | <i>T. dicoccum</i> | 0.66 | 0.71 | 0.77 | 0.80 | 1.70  | 1.49 | 1.69 | 1.63 |
|                                 |                    |      |      |      |      |       |      |      |      |
| Water Absorption Capacity (WAC) | Altın-40/98        | 0.96 | 0.89 | 0.70 | 0.61 | 0.43  | 0.45 | 0.80 | 0.75 |
|                                 | Artuklu            | 1.01 | 0.78 | 0.66 | 0.48 | 0.03  | 0.86 | 0.91 | 1.00 |
|                                 | Çakmak-79          | 0.94 | 0.75 | 0.64 | 0.42 | 1.51  | 1.28 | 1.13 | 1.19 |
|                                 | Çeşit-1252         | 0.75 | 0.63 | 0.46 | 0.46 | 2.16  | 1.37 | 1.40 | 1.01 |
|                                 | Eminbey            | 0.81 | 0.72 | 0.52 | 0.33 | 1.45  | 0.95 | 1.20 | 1.24 |
|                                 | Kızıltan-91        | 0.88 | 0.76 | 0.67 | 0.49 | 1.04  | 0.92 | 0.86 | 0.95 |
|                                 | Kunduru-1149       | 0.86 | 0.70 | 0.62 | 0.50 | 1.90  | 1.35 | 1.15 | 1.03 |
|                                 | Meram-2002         | 1.00 | 0.60 | 0.60 | 0.40 | 0.53  | 1.63 | 1.15 | 1.18 |
|                                 | Mirzabey 2000      | 0.97 | 0.86 | 0.72 | 0.64 | 0.53  | 0.63 | 0.79 | 0.71 |
|                                 | Sarıçanak-98       | 0.93 | 0.78 | 0.70 | 0.50 | 0.30  | 0.73 | 0.73 | 0.92 |
|                                 | Selçuklu-97        | 0.72 | 0.57 | 0.50 | 0.33 | 0.86  | 1.09 | 0.99 | 1.11 |
|                                 | <i>T. dicoccum</i> | 0.87 | 0.81 | 0.67 | 0.53 | 1.19  | 0.74 | 0.86 | 0.89 |

**Supplementary 3.** Eigenvalues and percent of total variation for the principal components.

| <b>Stress Level</b> | <b>Principal Components</b> | <b>PC1</b> | <b>PC2</b> | <b>PC3</b> | <b>PC4</b> | <b>PC5</b> | <b>PC6</b> | <b>PC7</b> | <b>PC8</b> | <b>PC9</b> | <b>PC10</b> | <b>PC11</b> |
|---------------------|-----------------------------|------------|------------|------------|------------|------------|------------|------------|------------|------------|-------------|-------------|
| <b>Control</b>      | <b>Eigenvalue</b>           | 3.79       | 1.47       | 1.06       | 0.51       | 0.12       | 0.05       | 0.00       | -          | -          | -           | -           |
|                     | <b>Variance (%)</b>         | 54.14      | 21.06      | 15.14      | 7.24       | 1.75       | 0.65       | 0.02       | -          | -          | -           | -           |
|                     | <b>Cumulative (%)</b>       | 54.14      | 75.20      | 90.34      | 97.58      | 99.33      | 99.98      | 100.00     | -          | -          | -           | -           |
| <b>-0.50 bar</b>    | <b>Eigenvalue</b>           | 7.43       | 3.46       | 1.31       | 0.74       | 0.62       | 0.26       | 0.08       | 0.05       | 0.04       | 0.01        | 0.01        |
|                     | <b>Variance (%)</b>         | 53.07      | 24.68      | 9.37       | 5.29       | 4.43       | 1.84       | 0.55       | 0.36       | 0.27       | 0.10        | 0.05        |
|                     | <b>Cumulative (%)</b>       | 53.07      | 77.75      | 87.12      | 92.41      | 96.84      | 98.68      | 99.23      | 99.59      | 99.86      | 99.96       | 100.00      |
| <b>-1.48 bar</b>    | <b>Eigenvalue</b>           | 6.50       | 3.09       | 2.78       | 1.16       | 0.21       | 0.10       | 0.07       | 0.05       | 0.03       | 0.02        | 0.01        |
|                     | <b>Variance (%)</b>         | 46.42      | 22.05      | 19.86      | 8.26       | 1.48       | 0.75       | 0.49       | 0.34       | 0.19       | 0.12        | 0.05        |
|                     | <b>Cumulative (%)</b>       | 46.42      | 68.47      | 88.33      | 96.58      | 98.06      | 98.81      | 99.31      | 99.64      | 99.83      | 99.95       | 100.00      |
| <b>-2.95 bar</b>    | <b>Eigenvalue</b>           | 4.97       | 4.44       | 2.89       | 0.67       | 0.48       | 0.33       | 0.09       | 0.06       | 0.04       | 0.03        | 0.00        |
|                     | <b>Variance (%)</b>         | 35.51      | 31.70      | 20.65      | 4.79       | 3.41       | 2.35       | 0.67       | 0.43       | 0.29       | 0.19        | 0.01        |
|                     | <b>Cumulative (%)</b>       | 35.51      | 67.20      | 87.85      | 92.65      | 96.06      | 98.41      | 99.09      | 99.52      | 99.81      | 99.99       | 100.00      |
| <b>-4.91 bar</b>    | <b>Eigenvalue</b>           | 4.81       | 4.06       | 2.90       | 1.13       | 0.68       | 0.26       | 0.12       | 0.03       | 0.01       | 0.00        | 0.00        |
|                     | <b>Variance (%)</b>         | 34.37      | 29.00      | 20.72      | 8.08       | 4.88       | 1.85       | 0.82       | 0.20       | 0.07       | 0.01        | 0.00        |
|                     | <b>Cumulative (%)</b>       | 34.37      | 63.37      | 84.09      | 92.17      | 97.05      | 98.89      | 99.72      | 99.91      | 99.99      | 100.00      | 100.00      |
| <b>Mean</b>         | <b>Eigenvalue</b>           | 6.88       | 2.87       | 2.77       | 0.94       | 0.33       | 0.12       | 0.05       | 0.03       | 0.01       | 0.00        | 0.00        |
|                     | <b>Variance (%)</b>         | 49.14      | 20.50      | 19.80      | 6.69       | 2.34       | 0.88       | 0.34       | 0.20       | 0.10       | 0.01        | 0.01        |
|                     | <b>Cumulative (%)</b>       | 49.14      | 69.63      | 89.43      | 96.11      | 98.45      | 99.33      | 99.68      | 99.88      | 99.98      | 99.99       | 100.00      |
